# Supplementary material for: High-performance NH3 production via NO electroreduction over a NiO nanosheet array
Source: Royal Society of Chemistry journal article supplement (doi:10.1039/d1cc06113e), 2021-01-01
Supplement: d1cc06113e1.pdf [file d1cc06113e1.pdf]

## Electronic Supplementary Information

### Experimental

*Materials:* Hydrazine ( $\text{N}_2\text{H}_4 \cdot \text{H}_2\text{O}$ ), ammonium fluoride ( $\text{NH}_4\text{F}$ ), Nitric acid ( $\text{HNO}_3$ ), Sulfuric acid ( $\text{H}_2\text{SO}_4$ ), hydrochloric acid ( $\text{HCl}$ ), and ethanol ( $\text{C}_2\text{H}_5\text{OH}$ ) were purchased from Chengdu Kelong Chemical Reagent Factory. Salicylic acid ( $\text{C}_7\text{H}_6\text{O}_3$ ), ammonium chloride ( $\text{NH}_4\text{Cl}$ ), Ethylene Diamine Tetraacetic Acid (EDTA), *p*-dimethylaminobenzaldehyde ( $\text{C}_9\text{H}_{11}\text{NO}$ ), sodium citrate dehydrates ( $\text{C}_6\text{H}_5\text{Na}_3\text{O}_7 \cdot 2\text{H}_2\text{O}$ ), sodium nitroferricyanide dihydrate ( $\text{C}_5\text{FeN}_6\text{Na}_2\text{O} \cdot 2\text{H}_2\text{O}$ ),  $\text{FeSO}_4$ , and sodium hypochlorite solution ( $\text{NaClO}$ ) were purchased from Beijing Chemical Corp. (China). All the reagents were used as received without further purification. A mixed gas of NO/Ar (10 vol.% NO) was purchased from Yinde City Xizhou Gas Co., Ltd (China). Ti mesh (TM) was purchased from Hongshan District, Wuhan Instrument Surgical Instruments business and was pretreated in  $\text{HNO}_3$ , then was cleaned by sonication sequentially in acetone,  $\text{H}_2\text{O}$ , and  $\text{C}_2\text{H}_5\text{OH}$  several times to remove the surface impurities. The water used throughout all experiments was purified through a Millipore system.

*Synthesis of  $\text{Ni}(\text{OH})_2/\text{TM}$ :* 1.4 mmol  $\text{Ni}(\text{NO}_3)_2 \cdot 6\text{H}_2\text{O}$ , 2.7 mmol  $\text{NH}_4\text{F}$ , and 7 mmol UREA and a piece of Ti mesh (2cm \* 2cm) were dissolved in 35 ml  $\text{H}_2\text{O}$ . Then put this mixture into the reactor made by Teflon. After reaction for 8 h at  $100^\circ\text{C}$  collected the Ti mesh washed with EtOH and  $\text{H}_2\text{O}$  several times. The  $\text{Ni}(\text{OH})_2/\text{TM}$  was dried under vacuum at  $60^\circ\text{C}$  overnight.

*Synthesis of  $\text{NiO}/\text{TM}$ :* The  $\text{Ni}(\text{OH})_2/\text{TM}$  was used as a precursor for annealing in a tube furnace at  $350^\circ\text{C}$  in the air for 180 min. After the cooling to room temperature, The  $\text{NiO}/\text{TM}$  was washed three times with deionized water. The  $\text{NiO}/\text{TM}$  was totally dried under vacuum at  $60^\circ\text{C}$  overnight.

*Characterizations:* SEM (Zeiss Gemini SEM 300) and TEM (FEI TF200) were adopted to characterize the morphology and structure of as-synthesized samples. The crystal phases of the samples were evaluated through the XRD (Philips PW1730). XPS (Thermo ESCALAB 250XI) adopting Mg as the excitation source and EDX elemental mapping images were carried out to investigate the chemical composition and element distribution of the samples.

*Electrochemical measurement:* NO reduction experiments were carried out in a two-compartment cell under ambient conditions, which was separated by the Nafion

117 membrane. The Nafion 117 membrane was pretreated with 5% H<sub>2</sub>O<sub>2</sub> solution and 10% H<sub>2</sub>SO<sub>4</sub> for 1 h at 80°C, respectively, and deionized water for another 1 h. Electrochemical data were collected with a CHI 660E electrochemical workstation. Three electrode system was used in the electrochemical measurement and the three electrodes arrangement consisted of a graphite rod as the counter electrode, Ag/AgCl (saturated KCl electrolyte) as the reference electrode. The NiO/TM can be directly used as a working electrode. All potentials were referenced against the reversible hydrogen electrode (RHE) based on the Nernst equation ( $E_{\text{RHE}} = E_{\text{SCE}} + 0.059 \times \text{pH} + 0.197$ ). For NO reduction experiments, the chronoamperometry test was conducted in NO saturated 0.10 M Na<sub>2</sub>SO<sub>4</sub> + 0.05 mM Fe-EDTA solution (50 mL) (the electrolyte was purged with Ar for 10 min before the measurement.). NO/Ar mixture gas was introduced to the cathodic compartment using properly positioned spargers so that the whole cathode was hit by the gas bubbles.

*Determination of NH<sub>3</sub>*: The yield of the NH<sub>3</sub> was determined by a spectrophotometry measurement with the indophenol blue method. In detail, 4 mL electrolyte was obtained from the cathodic chamber and mixed with 50 μL oxidizing solution containing NaClO (4.5%) and NaOH (0.75 M), 500 μL coloring solution containing C<sub>7</sub>H<sub>5</sub>O<sub>3</sub>Na (0.4 M) and NaOH (0.32 M), and 50 μL catalyst solution Na<sub>2</sub>Fe(CN)<sub>5</sub>NO·2H<sub>2</sub>O (1 wt%) for 1 h. The concentration-absorbance curve was calibrated using the standard NH<sub>4</sub>Cl solution with NH<sub>3</sub> concentrations of 0, 0.1, 0.2, 0.3, 0.4, 0.5, and 1.0 μg mL<sup>-1</sup> in 0.1 M Na<sub>2</sub>SO<sub>4</sub>. These solutions were identified via UV-Vis spectroscopy at the wavelength of 660 nm. The concentration-absorbance curves were calibrated using a standard NH<sub>3</sub> solution with a series of concentrations. The fitting curve ( $y = 0.53x + 0.021$ ,  $R^2 = 0.9999$ ) shows good linear relation of absorbance value with NH<sub>3</sub> concentration.

*Determination of N<sub>2</sub>H<sub>4</sub>*: A mixed solution of 1.97 g C<sub>9</sub>H<sub>11</sub>NO, 10 mL concentrated HCl and 100 ml ethanol was used as a color reagent. The calibration curve was plotted as follow: firstly, preparing a series of N<sub>2</sub>H<sub>4</sub> solutions of known concentration as standards; secondly, adding 4 mL color reagent into above N<sub>2</sub>H<sub>4</sub> solution separately, and standing 20 min at room temperature; finally, the absorbance of the resulting solution was measured at 460 nm in 10 mm glass cuvette by the UV-Vis-NIR spectrophotometer. The fitting curve shows good linear relation of absorbance with N<sub>2</sub>H<sub>4</sub> concentration ( $y = 0.8315x + 0.00214$ ,  $R^2 = 0.999$ ).

*Determination of  $\text{NO}_3^-$* : Firstly, a certain amount of electrolyte was taken out from the electrolytic cell and diluted to 5 mL to the detection range. Then, 0.1 mL 1 M HCl and 0.01 mL 0.8 wt% sulfamic acid solution were added into the aforementioned solution. The absorption spectrum was measured using a UV-Vis spectrophotometer and the absorption intensities at a wavelength of 220 nm and 275 nm were recorded. The final absorbance value was calculated by this equation:  $A = A_{220 \text{ nm}} - 2A_{275 \text{ nm}}$ . The concentration-absorbance curve was calibrated using a series of standard  $\text{NaNO}_3$  solutions and the  $\text{NaNO}_3$  crystal was dried at 110 °C for 2 h in advance.

*Determination of FE and  $\text{NH}_3$  yield*: The Faradaic efficiency for NORR was defined as the quantity of electric charge used for synthesizing ammonia divided by the total charge passed through the electrodes during the electrolysis. The yield of produced  $\text{NH}_3$  was measured by the colorimetric method. From the reaction equation, it can be seen that the formation of one ammonia molecule requires three electrons, the Faradaic efficiency can be calculated as follows:

$$\text{FE} = n * F * [\text{NH}_3] * V / (17 * Q) * 100\% \quad (1)$$

where F is the Faraday constant, Q is the total quantity of applied electricity; t is the reduction time, n is the number of electrons was needed to produce one product molecule.

The rate of ammonia formation was calculated as follows:

$$\text{NH}_3 \text{ yield} = ([\text{NH}_3] * V) / (t * S) \quad (2)$$

Where  $[\text{NH}_3]$  is the  $\text{NH}_3$  concentration, V is the volume of electrolyte, t is the NRR time and S is the catalyst electrode area.

*Zn-NO battery*: A NiO nanosheet-loaded carbon paper electrode was employed as the cathode to perform the NORR in a cathodic electrolyte (0.1 M  $\text{Na}_2\text{SO}_4$ ). A polished Zn plate was set in an anodic electrolyte (1 M NaOH), and a bipolar membrane was used to separate the two different electrolytes. During the battery discharge process, the Zn-NO electrochemistry implements electrochemical NO reduction driven by Zn dissolution, the electrochemical reactions on each electrode can be described as follows:

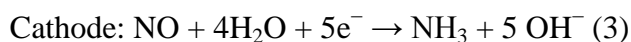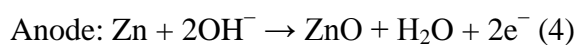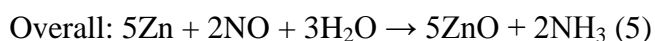

Zn-NO battery potentially has a higher voltage output than that of the  $\text{O}_2$ -based cells, namely, metal-air batteries (as displayed in Table S3).

*Calculation details:* First-principles calculations with spin-polarized were performed based on density functional theory (DFT) implemented in the VASP package,<sup>[1]</sup> and the interaction between valence electrons and ionic core was expanded using the projector augmented wave (PAW) approach with a cutoff of 450 eV.<sup>[2]</sup> Perdew-Burke-Ernzerhof functional (PBE) with semi-empirical corrections of DFT-D3 was adopted to describe exchange-correlation functional effect based on general gradient approximation (GGA).  $2 \times 2$  NiO (200) surface with four layers were modeled, for which the bottom two layer was fixed and the upper two layers were allowed to relax.<sup>[3]</sup> The thickness of the vacuum region is  $> 15 \text{ \AA}$  to avoid the spurious interaction. Hubbard U model was implemented with an effective  $U = 6.2 \text{ eV}$  for Ni 3d orbitals. The Brillouin zone was sampled by  $3 \times 3 \times 1$  special k-points using the Monkhorst Pack scheme for structural configuration optimizations.<sup>[4]</sup> The force convergence thresholds are  $0.02 \text{ eV/\AA}$  and the total energy less than  $1\text{E}^{-5} \text{ eV}$ , respectively. The theoretical calculation results were processing and analyzed by VASPKIT software.<sup>[5]</sup>

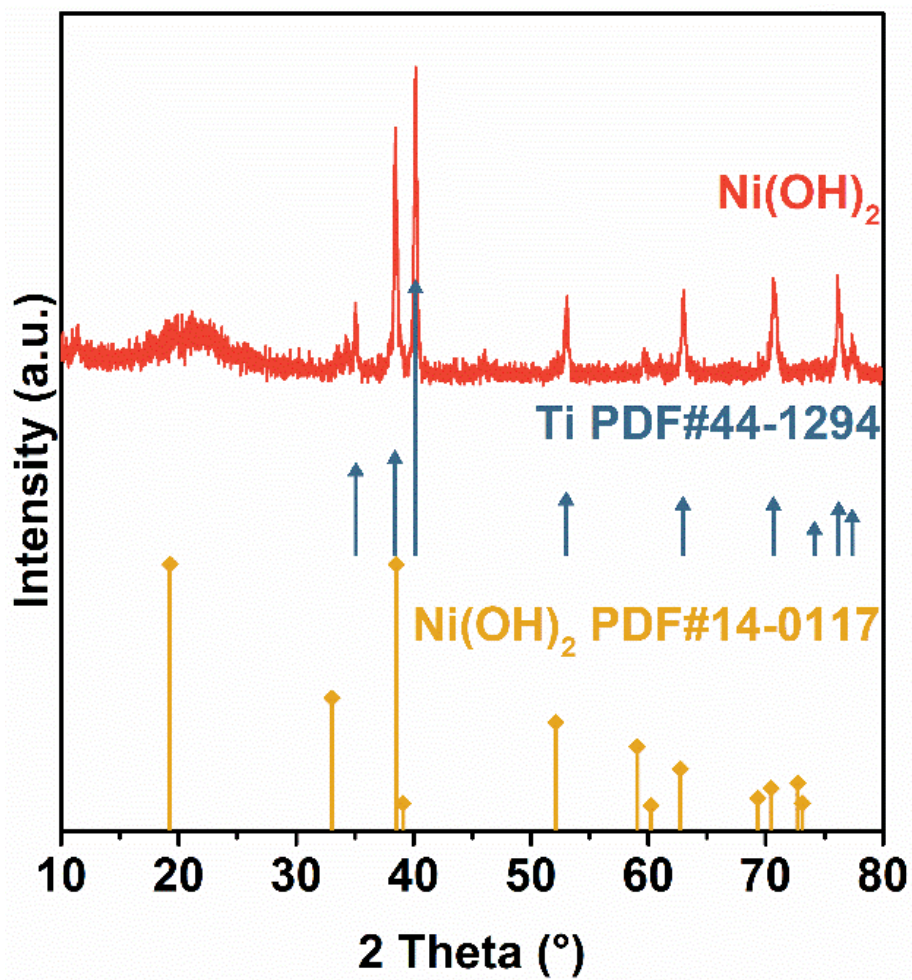

Fig. S1. XRD pattern of Ni(OH)<sub>2</sub>/TM.

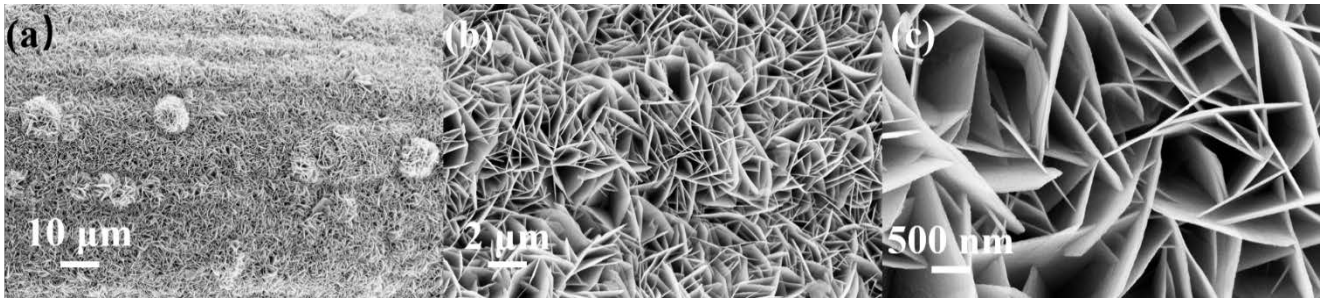

**Fig. S2.** (a-c) SEM images of Ni(OH)<sub>2</sub>/TM.

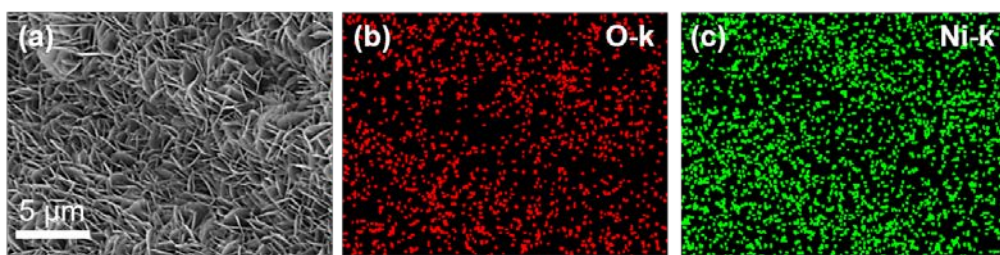

**Fig. S3.** (a) SEM image and corresponding EDX elemental mapping images of (b) O and (c) Ni for NiO/TM.

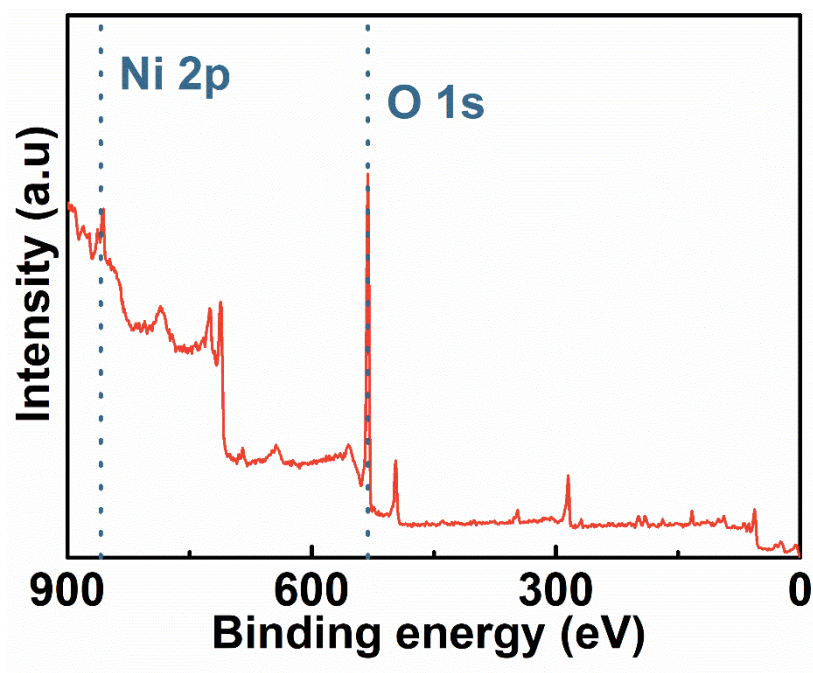

Fig. S4. XPS survey spectrum of NiO/TM.



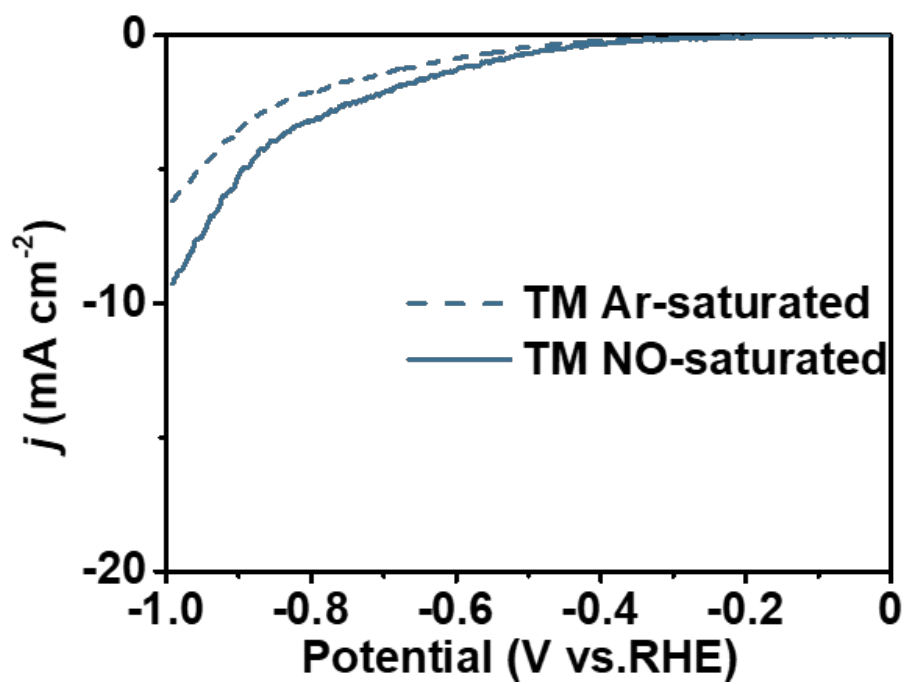

**Fig. S5.** LSV curves of TM in NO- and Ar-saturated 0.1 M Na<sub>2</sub>SO<sub>4</sub> (scan rate: 5 mV s<sup>-1</sup>).

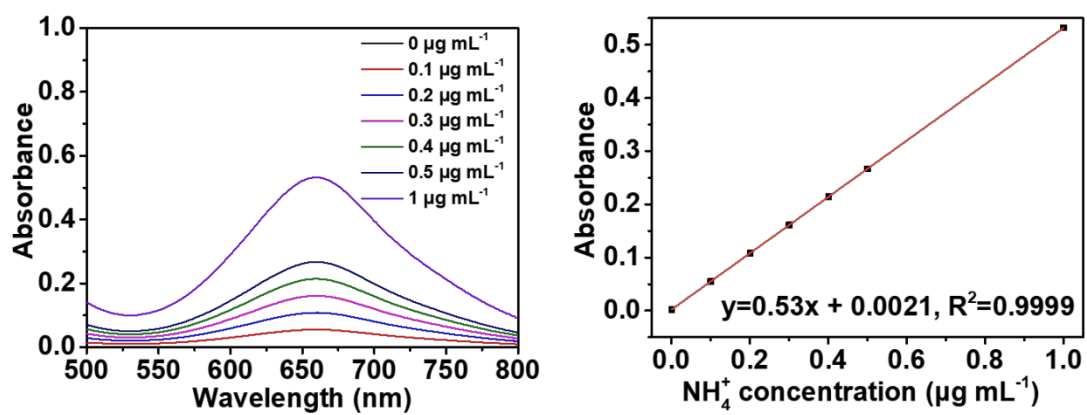

**Fig. S6.** (a) UV-Vis absorption spectra of indophenol assays with  $\text{NH}_3$  after incubated for 1 h at room temperature and corresponding (b) calibration curve used for estimating  $\text{NH}_3$ .

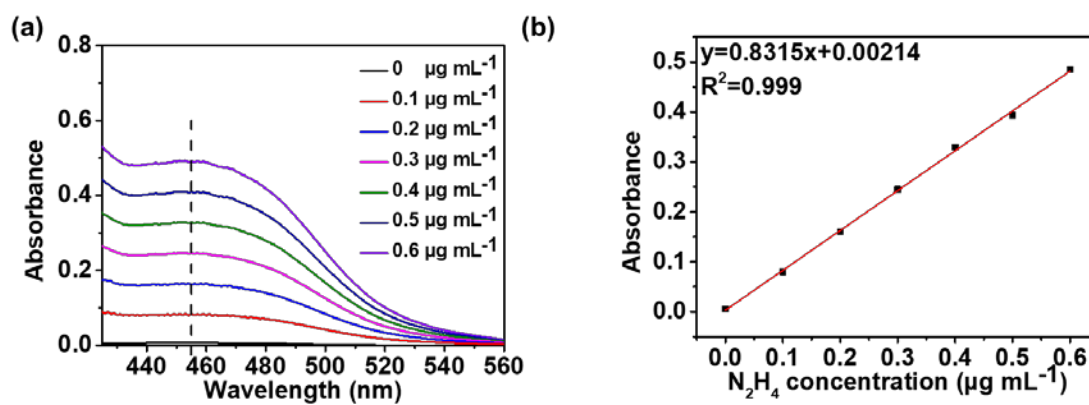

**Fig. S7.** (a) UV-Vis absorption spectra of various  $N_2H_4$  concentration after incubated for 15 min at room temperature and corresponding (b) calibration curve used for estimating  $N_2H_4$ .

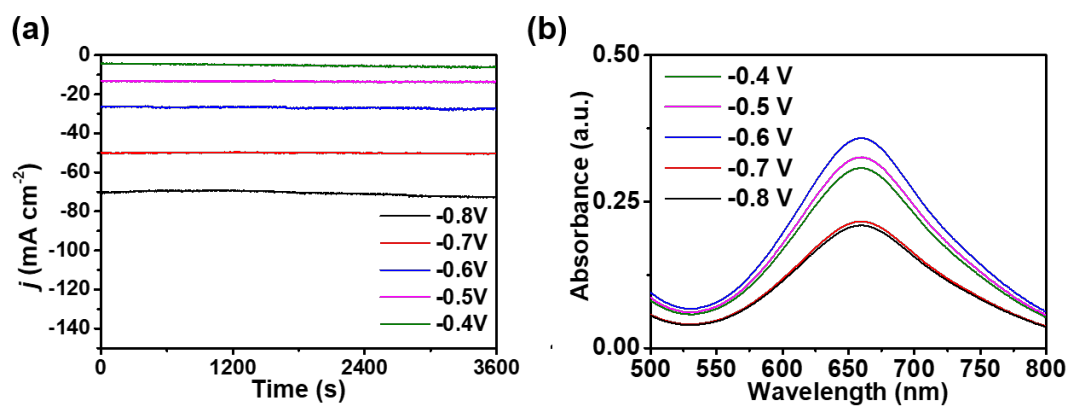

**Fig. S8.** (a) Time-dependent current density curves (1 h) for NiO/TM in NO-saturated 0.1 M Na<sub>2</sub>SO<sub>4</sub> with 0.05 mM Fe-EDTA at various potentials. (b) Corresponding UV-vis absorption spectra of the electrolytes stained with indophenol indicator. (1:10).

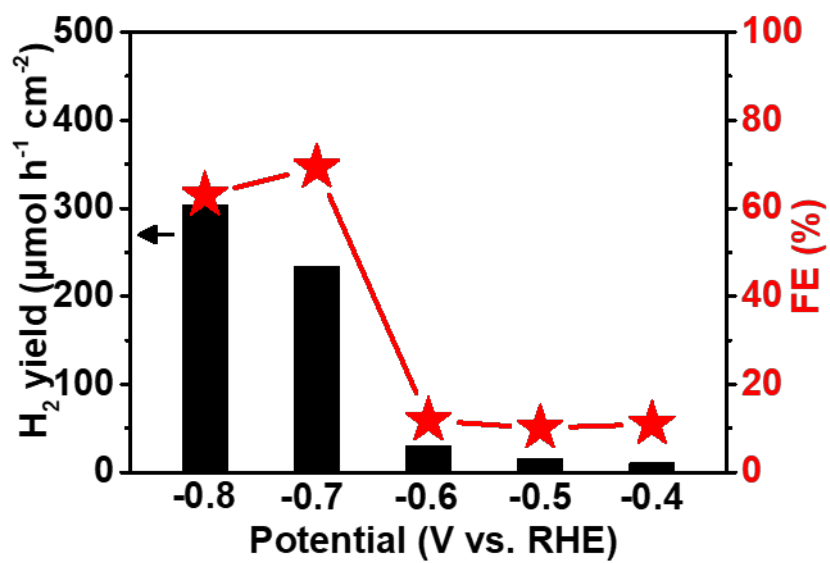

**Fig. S9.** NH<sub>3</sub> yields and FEs for NiO/TM of NORR at various potentials

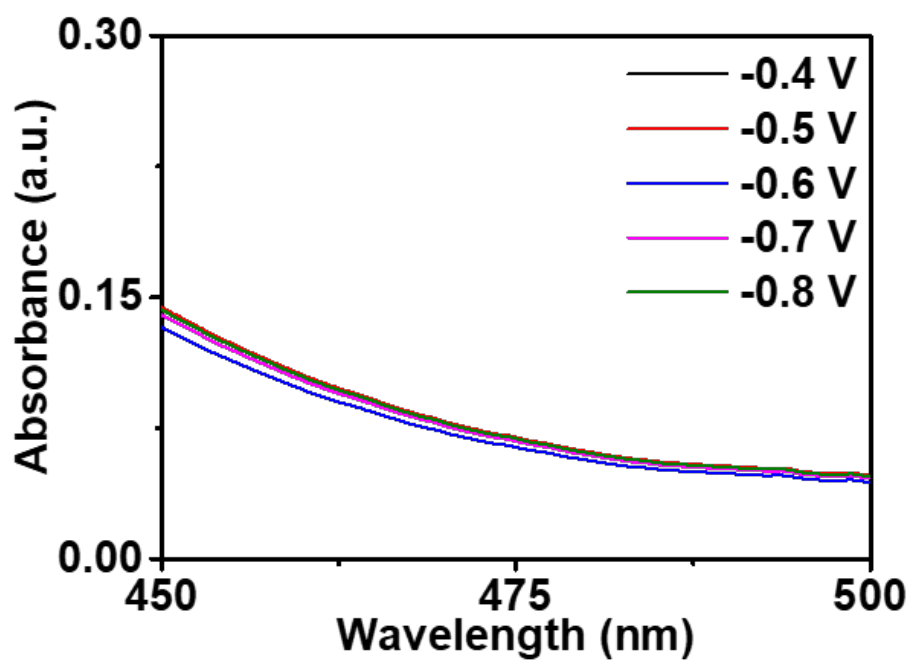

**Fig. S10.** UV-Vis absorption spectra of electrolytes estimated by the method of Watt and Chrisp after 1 h electrolysis on NiO/TM at each given potential.

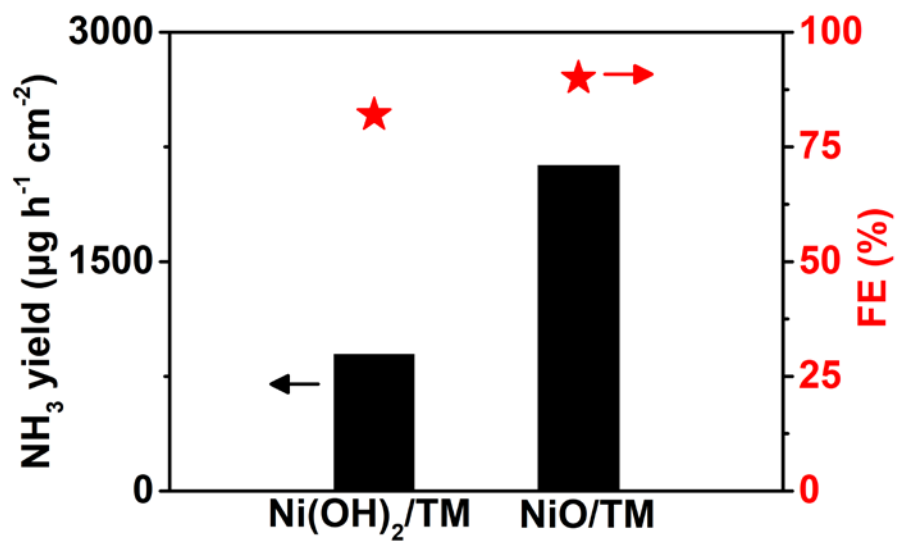

**Fig. S11.** FEs and yields of NH<sub>3</sub> for Ni(OH)<sub>2</sub>/TM and NiO/TM at -0.6 V.

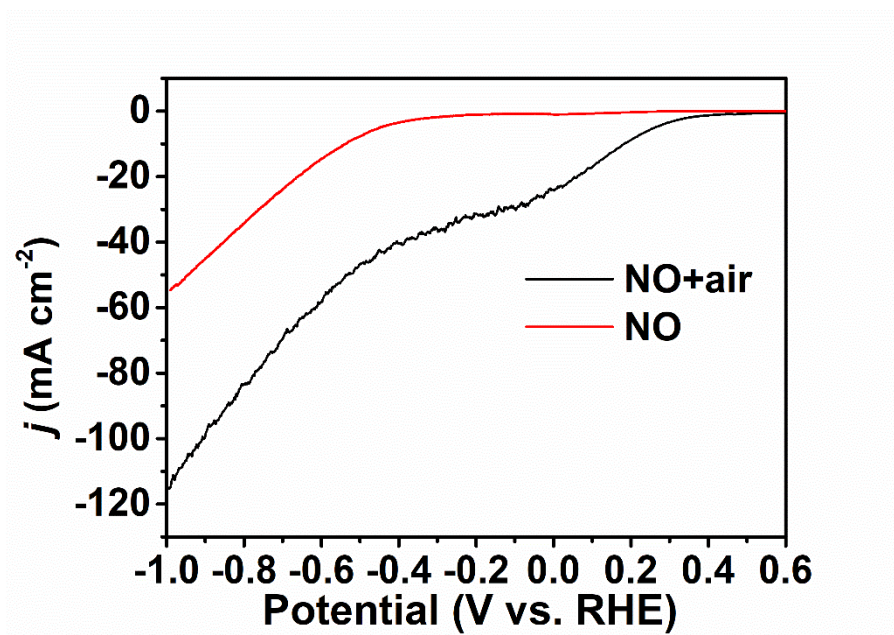

**Fig. S12.** LSV curves of NiO/TM in gas-tight (NO-saturated electrolyte) and open electrolytic cells (NO + air atmosphere).



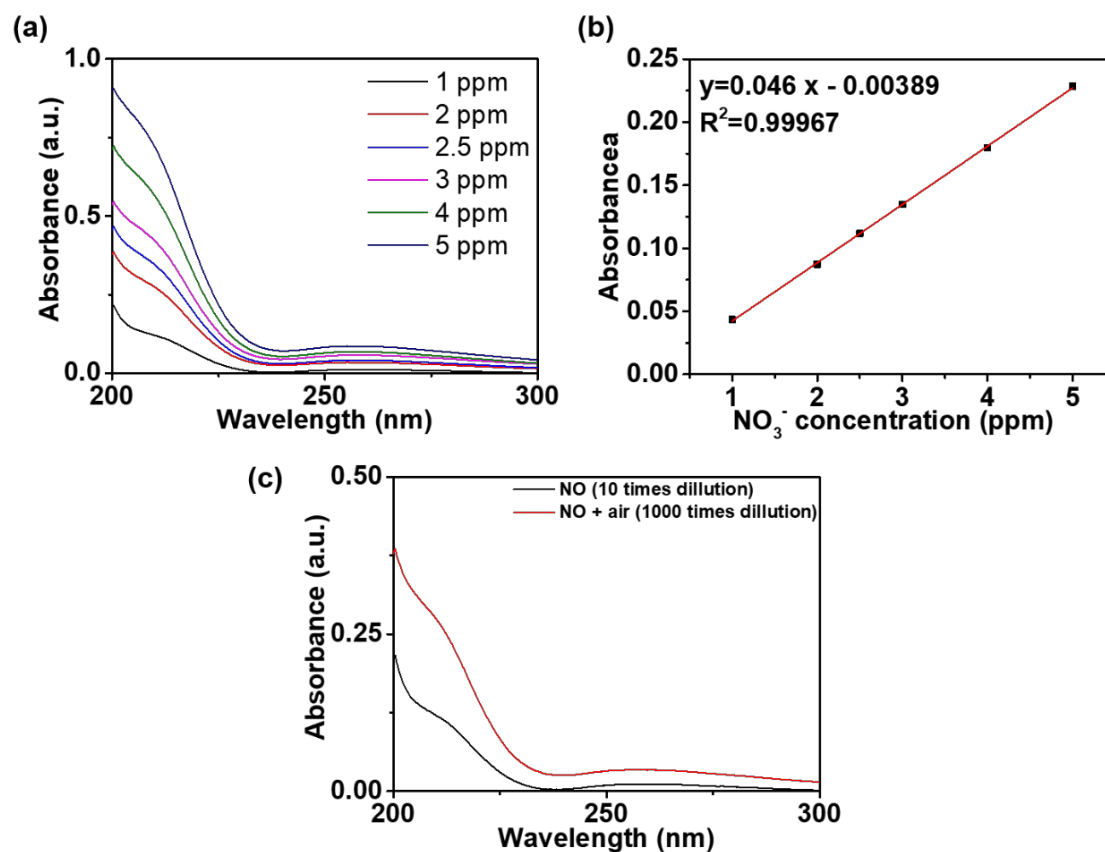

**Fig. S13.** (a) UV-Vis absorption spectra of various  $\text{NO}_3^-$  concentration after incubated for 20 min at room temperature and corresponding (b) calibration curve used for estimating  $\text{NO}_3^-$ . (c) UV-Vis absorption spectra of  $\text{NO}_3^-$  for NiO/TM in a gas-tight (in NO-saturated electrolyte) and open chambers (under NO + air atmosphere) at  $-0.6$  V after 1 h electrolysis.

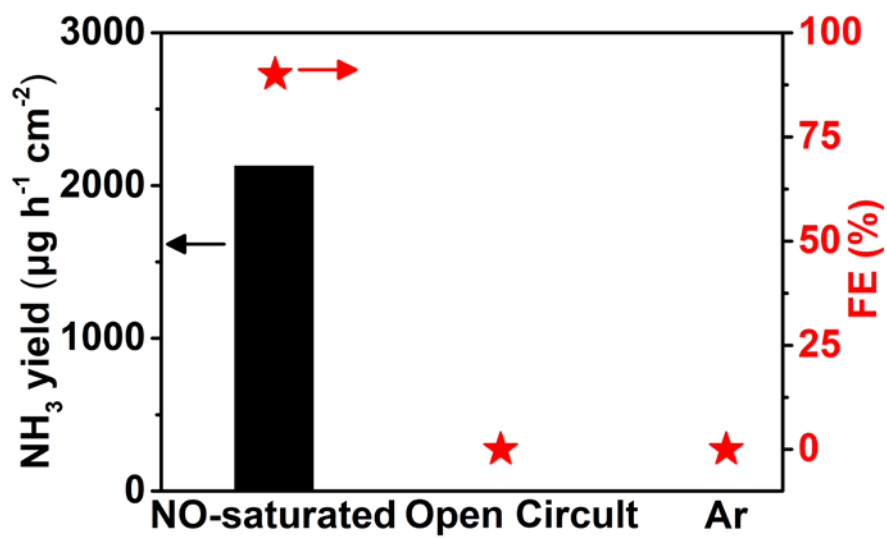

Fig. S14. NH<sub>3</sub> yields and FEs of NiO/TM under different conditions.

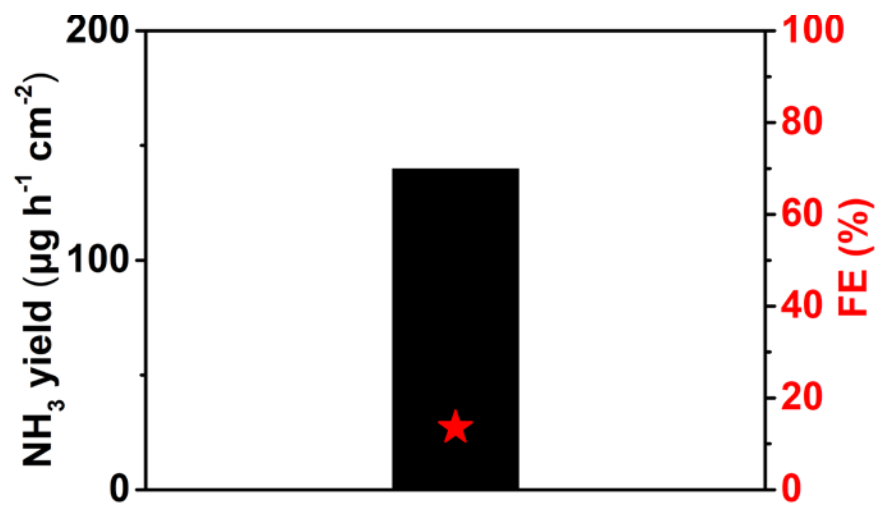

**Fig. S15.** NH<sub>3</sub> yield and FE of NORR on TM.

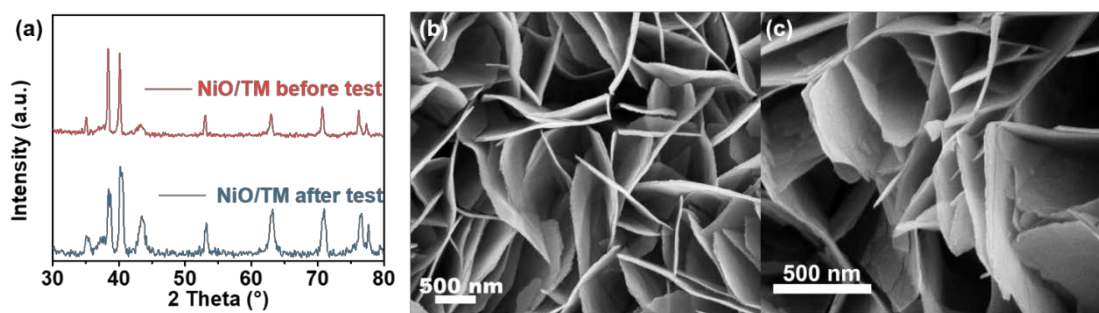

**Fig. S16.** (a) XRD patterns of NiO/TM before and after test. (b) SEM image of NiO/TM. (c) SEM image of post-electrolysis NiO/TM.

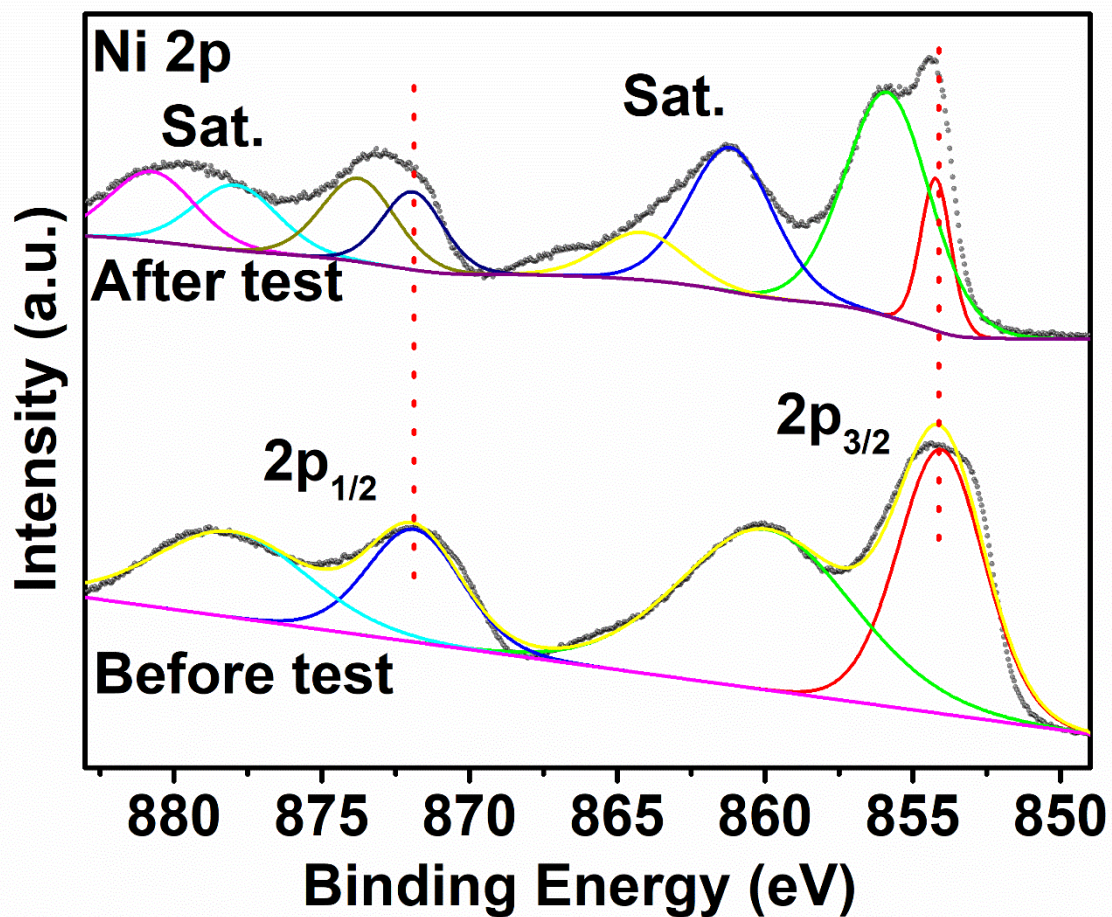

**Fig. S17.** XPS spectra of NiO/TM in Ni 2p region before and after electrolysis test.

The shoulder peaks in NiO/TM after test presented at 855.8 eV and 873.7 eV are derived from the Ni<sup>2+</sup> species on the surface.<sup>6,7</sup> And the peaks of Ni<sup>2+</sup> in the NiO/TM after test at 871.7 eV and 854.3 eV didn't show any shift after electrolysis test.

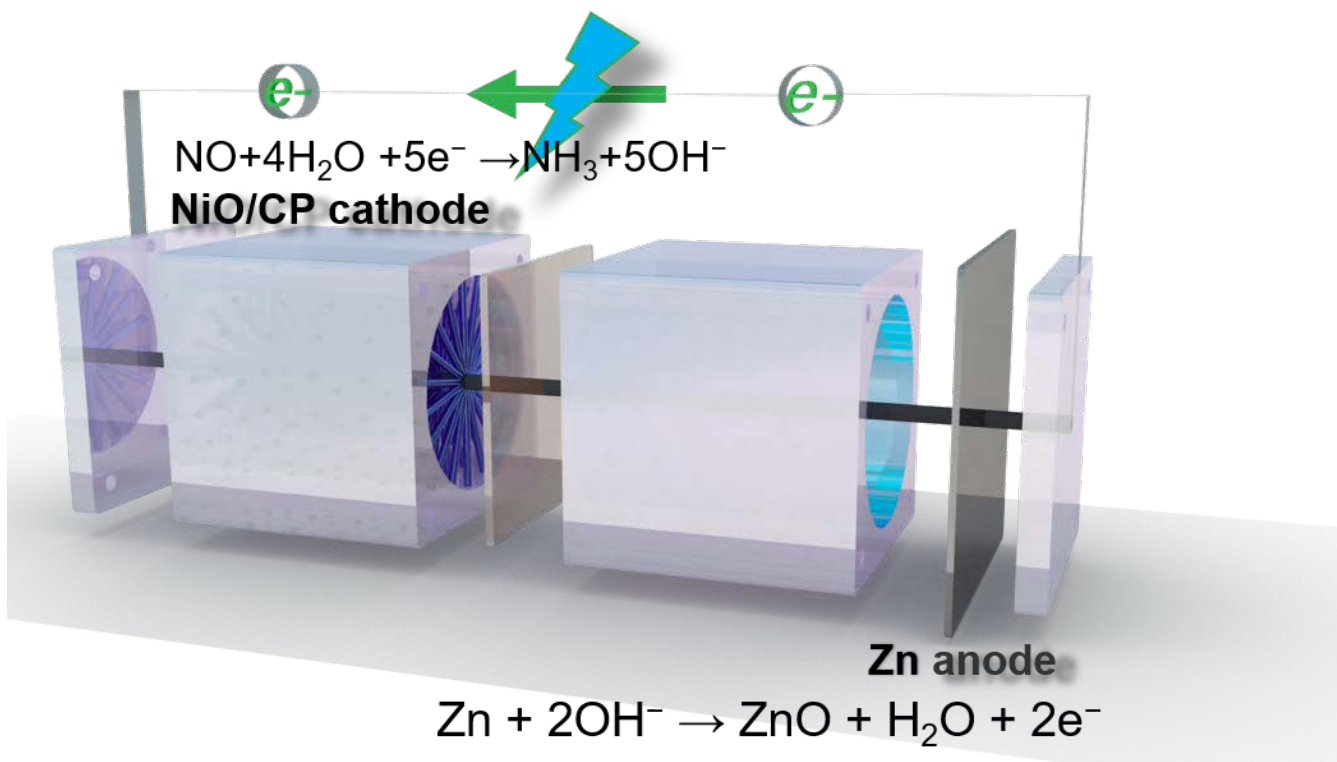

**Fig. S18.** Schematic of Zn-NO battery.

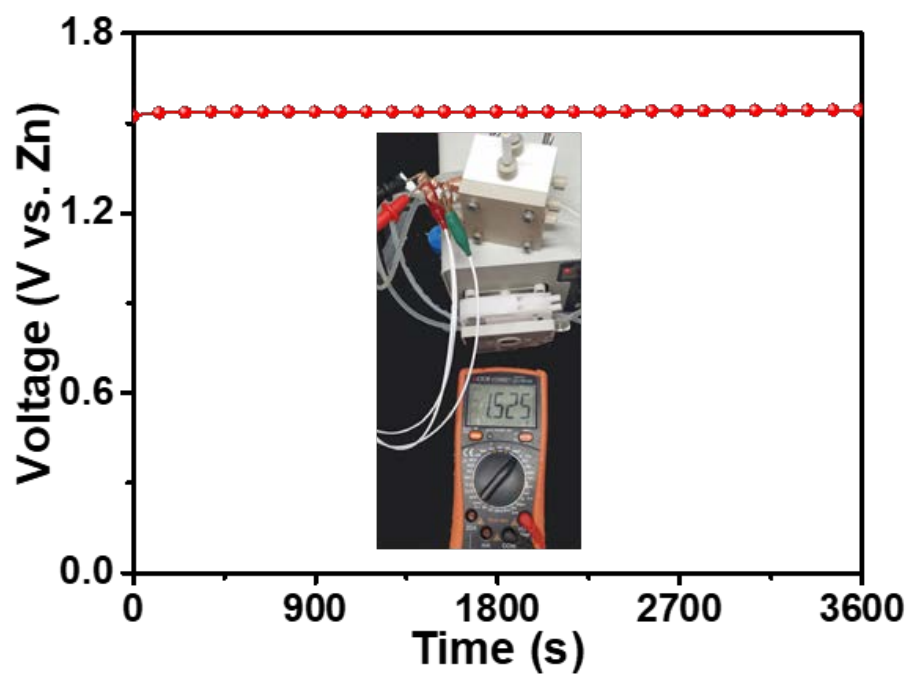

**Fig. S19.** Open-circuit voltage of the Zn-NO battery with the NiO/CP catalyst cathode.

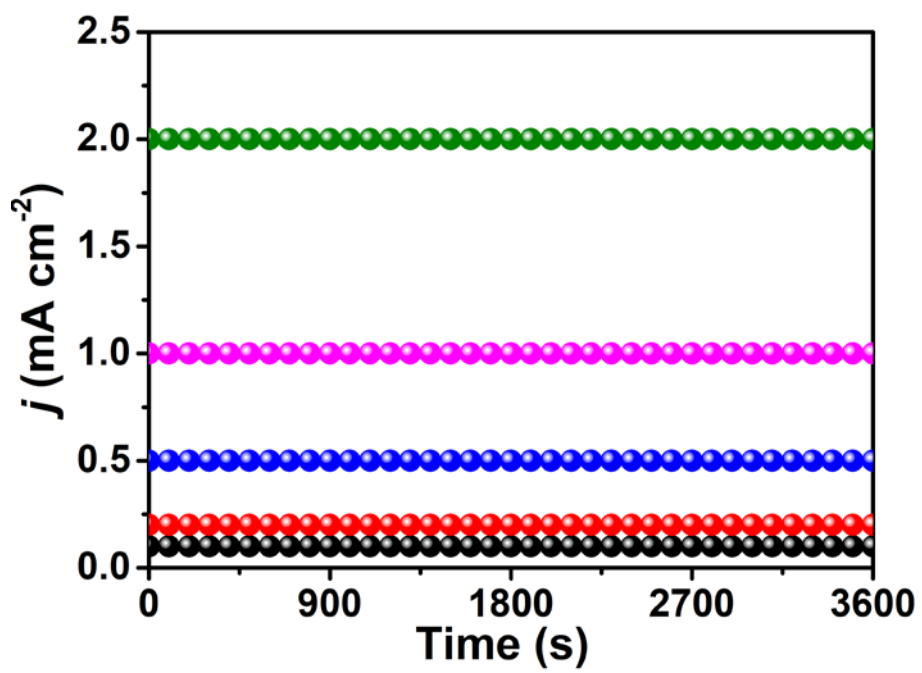

Fig. S20. Time-dependent current density curves of Zn-NO battery.



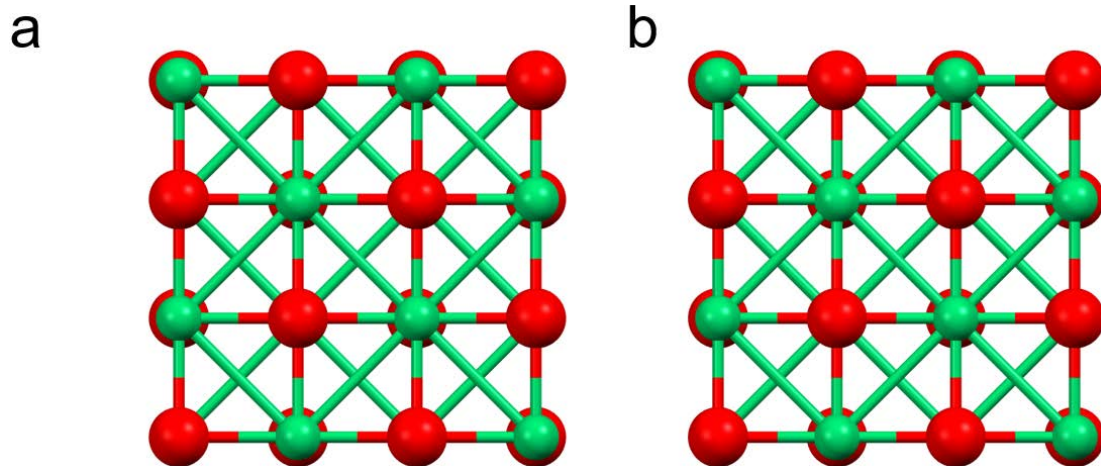

**Fig. S21.** (a) Top and (b) side views of the NiO (200) slab models. Green and red spheres represent Ni and O atoms, respectively.

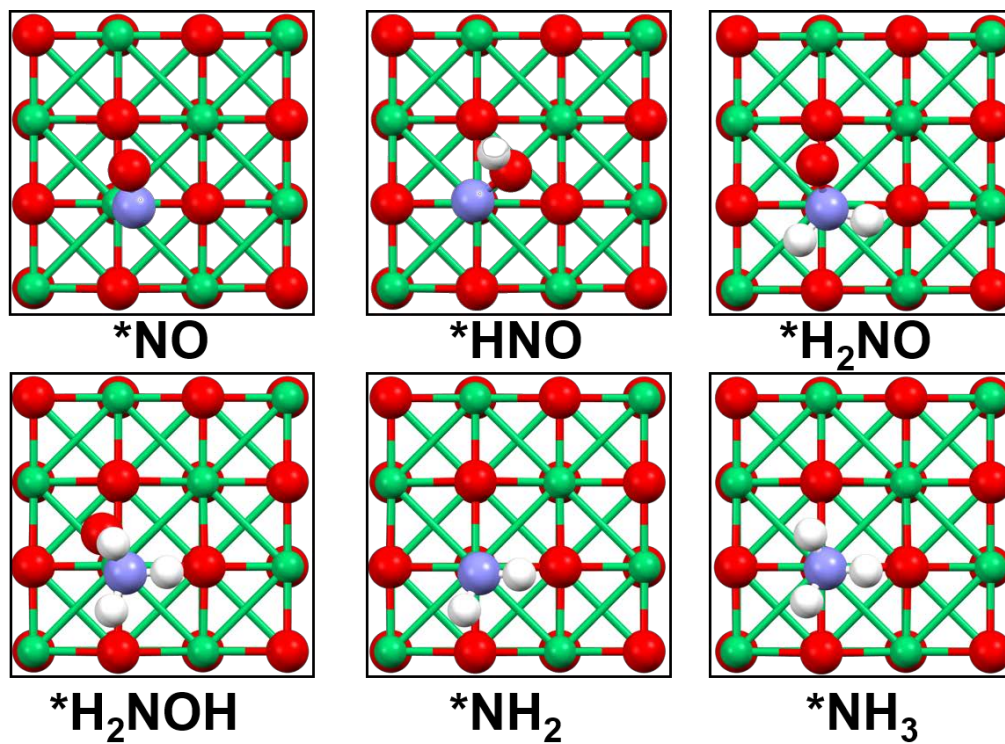

**Fig. S22.** Atomic structures of the corresponding intermediates. Green, red, blue, and white spheres represent Ni, O, N, and H atoms, respectively.

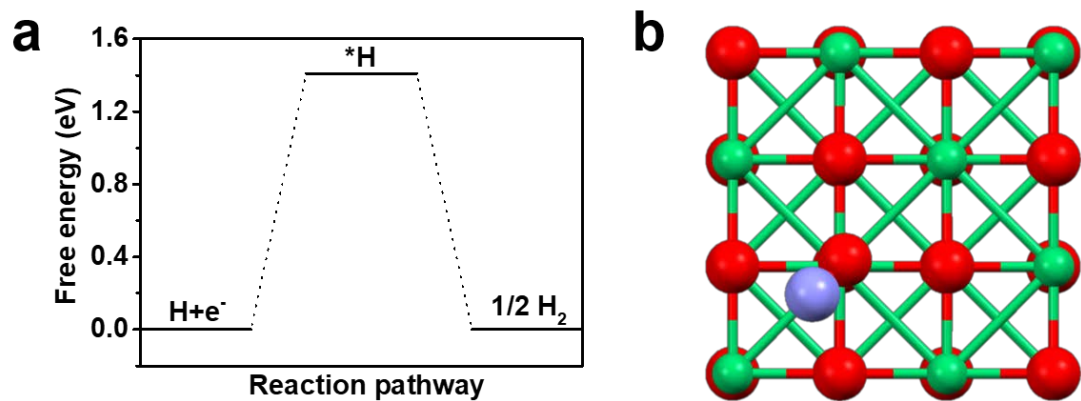

**Fig. S23.** (a) Free energy diagram of HER. (b) Top views of the NiO (200) with H atom slab models, blue sphere represents H atom.

**Table S1.** Comparison of NH<sub>3</sub> yields and FEs of NiO/TM with reported aqueous-based NRR and NORR electrocatalysts.

| Catalysts                        | Electrolyte                                                                  | NH <sub>3</sub> yield                                        | FE (%) | Potential (vs. RHE) | Ref.                                                             |
|----------------------------------|------------------------------------------------------------------------------|--------------------------------------------------------------|--------|---------------------|------------------------------------------------------------------|
| NiO/TM                           | 0.1 M Na <sub>2</sub> SO <sub>4</sub> +<br>0.05 mM<br>Fe <sup>2+</sup> -EDTA | 2130 μg h <sup>-1</sup><br>cm <sup>-2</sup>                  | 90     | -0.6 V              | This work                                                        |
| PdBi <sub>2</sub>                | 0.05 M H <sub>2</sub> SO <sub>4</sub>                                        | 59.05 μg h <sup>-1</sup><br>mg <sub>cat.</sub> <sup>-1</sup> | 21.5   | -0.2 V              | <i>Adv. Mater.</i> , 2021, <b>33</b> , 2007733                   |
| CuS                              | 0.1 M HCl                                                                    | 18.18 μg h <sup>-1</sup><br>mg <sub>cat.</sub> <sup>-1</sup> | 5.6    | -0.15 V             | <i>Inorg. Chem. Front.</i> , 2021, <b>8</b> ,<br>3105–3110       |
| MXene/TiFeO <sub>x</sub> -700    | 0.05 M H <sub>2</sub> SO <sub>4</sub>                                        | 2.19 μg<br>cm <sup>-2</sup> h <sup>-1</sup>                  | 25.4   | -0.2 V              | <i>ACS Nano</i> , 2020, <b>14</b> , 9089–9097                    |
| NbS <sub>2</sub>                 | 0.1 M HCl                                                                    | 37.58 μg h <sup>-1</sup><br>mg <sup>-1</sup>                 | 10.1   | -0.5 V              | <i>Appl. Catal. B: Environ.</i> , 2020, <b>270</b> ,<br>118892   |
| Bi <sub>2</sub> MoO <sub>6</sub> | 0.1 M HCl                                                                    | 20.46 μg h <sup>-1</sup><br>mg <sub>cat.</sub> <sup>-1</sup> | 8.1    | -0.6 V              | <i>ACS Sustain. Chem. Eng.</i> , 2019, <b>7</b> ,<br>12692–12696 |
| Au <sub>6</sub> /Ni              | 0.05 M H <sub>2</sub> SO <sub>4</sub>                                        | 7.4 μg h <sup>-1</sup><br>mg <sub>cat.</sub> <sup>-1</sup>   | 67.8   | -0.14 V             | <i>J. Am. Chem. Soc.</i> , 2019, <b>141</b> ,<br>14976–14980     |
| MoO <sub>2</sub>                 | 0.1 M HCl                                                                    | 12.2 μg h <sup>-1</sup><br>mg <sub>cat.</sub> <sup>-1</sup>  | 8.2    | -0.15 V             | <i>Nano Energy</i> , 2019, <b>59</b> , 10–16                     |
| Ru/MoS <sub>2</sub>              | 0.01 M HCl                                                                   | 7.0 μg h <sup>-1</sup><br>mg <sub>cat.</sub> <sup>-1</sup>   | 17.6   | -0.15 V             | <i>ACS Energy Lett.</i> , 2019, <b>4</b> , 430–435               |
| B <sub>4</sub> C                 | 0.1 M HCl                                                                    | 26.57 μg h <sup>-1</sup><br>mg <sub>cat.</sub> <sup>-1</sup> | 16.1   | -0.75 V             | <i>Nat. Commun.</i> , 2018, <b>9</b> , 3485                      |
| MoS <sub>2</sub>                 | 0.1 M HCl                                                                    | 2.9 μmol<br>cm <sup>-2</sup> h <sup>-1</sup>                 | 1.2    | -0.5 V              | <i>Adv. Mater.</i> , 2018, <b>30</b> , 1800191                   |
| VN nanoparticles                 | 1 mM H <sub>2</sub> SO <sub>4</sub>                                          | 1.18 μmol<br>cm <sup>-2</sup> h <sup>-1</sup>                | 6.1    | -0.1 V              | <i>J. Am. Chem. Soc.</i> , 2018, <b>140</b> ,<br>13387–13391     |
| Ru SAs/N-C                       | 0.05 M H <sub>2</sub> SO <sub>4</sub>                                        | 1.8 μmol<br>cm <sup>-2</sup> h <sup>-1</sup>                 | 29.6   | -0.2 V              | <i>Adv. Mater.</i> , 2018, <b>30</b> , 1803498                   |
| Au                               | 0.01 M HCl                                                                   | 25.57 μg h <sup>-1</sup><br>mg <sub>cat.</sub> <sup>-1</sup> | 6.0    | -0.2 V              | <i>ChemSusChem</i> , 2018, <b>11</b> , 3480                      |

|                                              |                                              |                                             |      |          |                                                                   |
|----------------------------------------------|----------------------------------------------|---------------------------------------------|------|----------|-------------------------------------------------------------------|
| Ag nanosheet                                 | 0.1 M HCl                                    | 0.164 $\mu\text{mol cm}^{-2} \text{h}^{-1}$ | 4.8  | -0.6 V   | <i>Chem. Commun.</i> , 2018, <b>54</b> , 11427–11430              |
| CoSe <sub>2</sub> @CNTs (NORR)               | Fe(II)EDTA + Na <sub>2</sub> SO <sub>4</sub> | /                                           | 48.1 | 2.5 V    | <i>Environ. Sci. Pollut. Res.</i> , 2017, <b>24</b> , 14249–14258 |
| Ru <sub>0.05</sub> Cu <sub>0.95</sub> (NORR) | 0.5 M Na <sub>2</sub> SO <sub>4</sub>        | 17.68 $\mu\text{mol cm}^{-2} \text{h}^{-1}$ | 64.9 | -0.5 V   | <i>Sci. China. Chem.</i> , 2021, <b>64</b> , 1493–1497            |
| Cu foam (NORR)                               | 0.25 M Li <sub>2</sub> SO <sub>4</sub>       | 517.1 $\mu\text{mol cm}^{-2} \text{h}^{-1}$ | 93.5 | -0.9 V   | <i>Angew. Chem., Int. Ed.</i> , 2020, <b>59</b> , 9711–9718       |
| Cu foil (NORR)                               | 0.25 M Li <sub>2</sub> SO <sub>4</sub>       | 95.0 $\mu\text{mol cm}^{-2} \text{h}^{-1}$  | 61.9 |          |                                                                   |
| Pt foil (NORR)                               | 0.25 M Li <sub>2</sub> SO <sub>4</sub>       | 99.4 $\mu\text{mol cm}^{-2} \text{h}^{-1}$  | 24.1 |          |                                                                   |
| Single atom Nb (NORR)                        | 0.1 M HCl                                    | 295.2 $\mu\text{mol cm}^{-2} \text{h}^{-1}$ | 77.1 | -0.6 V   | <i>Nano Energy</i> , 2020, <b>78</b> , 105321                     |
| FeNC (NORR)                                  | 0.1 M HClO <sub>4</sub>                      | ~20.2 $\mu\text{mol cm}^{-2} \text{h}^{-1}$ | ~5.1 | -0.2 V   | <i>Nat. Commun.</i> , 2021, <b>12</b> , 1856                      |
| Ag                                           | 0.5 M PBS + 50 mM EFeMC                      | 0.28 $\text{mol m}^{-2} \text{h}^{-1}$      | ~100 | -0.165 V | <i>ACS Energy Lett.</i> , 2020, <b>5</b> , 3647–3656              |
| MoS <sub>2</sub> /GF                         | 0.1 M HCl                                    | 99.6 $\mu\text{mol cm}^{-2} \text{h}^{-1}$  | 76.6 | 0.1 V    | <i>Angew. Chem., Int. Ed.</i> , 2021, <b>60</b> , 25263–25268     |
| Ni <sub>2</sub> P/CP                         | 0.1 M HCl                                    | 33.47 $\mu\text{mol cm}^{-2} \text{h}^{-1}$ | 76.9 | -0.2 V   | <i>J. Mater. Chem. A</i> , 2021, <b>9</b> , 24268–24275.          |

**Table S2.** Comparison of NH<sub>3</sub> yields and power density of our battery with reported metal-N<sub>2</sub> battery systems.

| <b>Catalyst</b>  | <b>NH<sub>3</sub> yield</b>                               | <b>Power density</b>           | <b>Ref.</b>                                                    |
|------------------|-----------------------------------------------------------|--------------------------------|----------------------------------------------------------------|
| <b>NiO/CP</b>    | <b>228 μg h<sup>-1</sup> cm<sup>-2</sup></b>              | <b>0.88 mW cm<sup>-2</sup></b> | <b>This work</b>                                               |
| Fe 1.0 HTNs      | 0.172 μg h <sup>-1</sup> cm <sup>-2</sup>                 | 0.02765 mW cm <sup>-2</sup>    | <i>J. Mater. Chem. A</i> , 2021, <b>9</b> , 4026–4035          |
| CoPi/HSNPC       | 11.62 μg h <sup>-1</sup> mg <sub>cat.</sub> <sup>-1</sup> | 0.31 mW cm <sup>-2</sup>       | <i>J. Mater. Chem. A</i> , 2021, <b>9</b> , 11370–11380        |
| CoPi/NPCS        | 14.7 μg h <sup>-1</sup> mg <sub>cat.</sub> <sup>-1</sup>  | 0.49 mW cm <sup>-2</sup>       | <i>ACS Appl. Mater. Inter.</i> , 2021, <b>13</b> , 12106–12117 |
| VN@NSC-900       | 0.172 μg h <sup>-1</sup> cm <sup>-2</sup>                 | 0.01642 mW cm <sup>-2</sup>    | <i>Appl. Catal. B: Environ.</i> , 2021, <b>280</b> , 119434    |
| Graphene/Pd      | 27.1 mg h <sup>-1</sup> g <sub>cat.</sub> <sup>-1</sup>   | /                              | <i>Energy Environ. Sci.</i> , 2020, <b>13</b> , 2888–2898      |
| NbS <sub>2</sub> | /                                                         | 0.31 mW cm <sup>-2</sup>       | <i>Appl. Catal. B: Environ.</i> , 2020, <b>270</b> , 118892    |
| BNFC-800         | /                                                         | 127 mW cm <sup>-2</sup>        | <i>J. Mater. Chem. A</i> , 2020, <b>8</b> , 8430–8439          |
| Cu-2             | 0.125 μg h <sup>-1</sup> cm <sup>-2</sup>                 | 0.0101 mW cm <sup>-2</sup>     | <i>Chem. Commun.</i> , 2019, <b>55</b> , 12801–12804           |

**Table S3.** Theoretical voltage for several types of metal-based batteries.

| Battery type       | Chemical reaction                                                                                               | Theoretical voltage (V) |
|--------------------|-----------------------------------------------------------------------------------------------------------------|-------------------------|
| Zn-NO              | $5\text{Zn} + 2\text{NO} + 3\text{H}_2\text{O} \rightarrow 5\text{ZnO} + 2\text{NH}_3$                          | 2.14                    |
| Li-S               | $2\text{Li} + \text{S} \rightarrow \text{Li}_2\text{S}$                                                         | 2.2                     |
| Li-O <sub>2</sub>  | $2\text{Li} + \text{O}_2 \rightarrow \text{Li}_2\text{O}_2$                                                     | 3.0                     |
| Li-CO <sub>2</sub> | $4\text{Li} + 3\text{CO}_2 \rightarrow \text{C} + 2\text{Li}_2\text{CO}_3$                                      | 2.7                     |
| Li-N <sub>2</sub>  | $6\text{Li} + \text{N}_2 \rightarrow 2\text{Li}_3\text{N}$                                                      | 0.54                    |
| Zn-CO <sub>2</sub> | $\text{Zn} + \text{CO}_2 + \text{H}_2\text{O} \rightarrow \text{ZnO} + \text{HCOOH}$                            | 0.955                   |
| Al-N <sub>2</sub>  | $2\text{Al} + \text{N}_2 \rightarrow 2\text{AlN}$                                                               | 0.99                    |
| Zn-Air             | $2\text{Zn} + \text{O}_2 \rightarrow 2\text{ZnO}$                                                               | 1.65                    |
| Zn-Nitrate         | $4\text{Zn} + \text{NO}_3^- + 3\text{H}_2\text{O} \rightarrow 4\text{ZnO} + \text{NH}_4\text{OH} + \text{OH}^-$ | 1.85                    |

## References

- 1 G. Kresse and J. Hafner, *Phys. Rev. B*, 1994, **49**, 14251–14269.
- 2 G. Kresse and D. Joubert, *Phys. Rev. B*, 1999, **59**, 1758–1775.
- 3 J.P. Perdew, K. Burke and M. Ernzerhof, *Phys. Rev. Lett.*, 1996, **77**, 3865–3868.
- 4 H.J. Monkhorst and J.D. Pack, *Phys. Rev. B*, 1976, **13**, 5188–5192.
- 5 V. Wang, N. Xu, J.-C. Liu, G. Tang and W.-T. Geng, *Comput. Phys. Commun.*, 2021, **267**, 108033.
- 6 Y. Wang, F. Qu, J. Liu, Y. Wang, J. Zhou and S. Ruan, *Sens. Actuators, B*, 2015, **209**, 515-523.
- 7 L. Sui, T. Yu, D. Zhao, X. Cheng, X. Zhang, P. Wang, Y. Xu, S. Gao, H. Zhao, Y. Gao and L. Huo, *J. Hazard. Mater.*, 2020, **385**, 121570.
